# Supplementary material for: Beyond the prey: male spiders highly invest in silk when producing worthless gifts
Source: PeerJ. 2022 Jan 5;10:e12757. doi: 10.7717/peerj.12757 (PMC8742539; doi:10.7717/peerj.12757)
Supplement: Supplemental Information 1 [file peerj-10-12757-s001.xlsx]

## Sheet: Pavon-Pelaez et al Data
Treatment group	Number of experiment	Male ID	Male Size (mm)	Gift. 0: Nutritive, 1:Worthless	Silk wrapping duration (min)	Number of silk wrapping bouts
Nutritive-Worthless	1	2731	4.7	0	3.1	2
Worthless	1	2740	4.4	1	3.3	5
Worthless	1	2762	4.7	1	5.7	5
Nutritive-Worthless	1	2765	4.4	1	4.8	6
Nutritive-Worthless	1	2770	4.3	0	4.6	5
Nutritive-Worthless	1	2771	4.4	0	3.2	4
Worthless	1	2775	4.4	1	4	3
Worthless	1	2782	4.2	1	1.2	1
Worthless	1	2821	4.5	1	6.8	4
Worthless	1	2825	4.1	1	6.3	4
Nutritive-Worthless	1	2875	4.1	0	1.5	1
Worthless	1	2878	4	1	3.3	4
Worthless	1	2879	3.7	1	1.1	2
Nutritive-Worthless	1	2880	4	0	2.6	2
Worthless	1	2881	3.8	1	7.3	7
Worthless	1	2882	3.4	1	3.1	4
Worthless	1	2883	3.5	1	1.7	1
Nutritive-Worthless	1	2884	4.3	0	2.9	2
Nutritive-Worthless	1	2885	4.2	0	0.7	1
Nutritive-Worthless	1	2886	4	0	3.1	2
Nutritive-Worthless	1	2887	4	1	5.3	5
Worthless	1	2889	3.8	1	3.3	5
Nutritive-Worthless	1	2892	4.4	0	4.4	2
Worthless	1	2893	3.8	1	3.9	2
Nutritive-Worthless	1	2894	5	0	3.6	2
Nutritive-Worthless	1	2895	4.5	0	4.1	3
Worthless	1	2896	3.9	1	3.3	2
Nutritive-Worthless	1	2897	3.9	1	7.1	2
Worthless	1	2898	3.6	1	3.9	3
Nutritive-Worthless	1	2900	4	1	2.6	3
Nutritive-Worthless	2	2731	4.7	0	2.7	3
Worthless	2	2740	4.4	1	8.3	6
Worthless	2	2762	4.7	1	5.2	4
Nutritive-Worthless	2	2770	4.3	0	6.5	5
Nutritive-Worthless	2	2771	4.4	0	4.4	5
Worthless	2	2772	4.2	1	5.3	5
Worthless	2	2775	4.4	1	8.2	6
Worthless	2	2782	4.2	1	1.8	2
Worthless	2	2821	4.5	1	6.7	4
Worthless	2	2878	4	1	4.6	4
Worthless	2	2879	3.7	1	3	3
Nutritive-Worthless	2	2880	4	0	4.7	5
Worthless	2	2881	3.8	1	4.4	5
Worthless	2	2883	3.5	1	4.6	4
Nutritive-Worthless	2	2884	4.3	0	1.2	1
Nutritive-Worthless	2	2885	4.2	0	1.2	1
Nutritive-Worthless	2	2887	4	0	4.7	5
Nutritive-Worthless	2	2892	4.4	0	1.8	2
Worthless	2	2893	3.8	1	NA	6
Nutritive-Worthless	2	2894	5	1	5.9	2
Nutritive-Worthless	2	2895	4.5	1	4.6	3
Worthless	2	2896	3.9	1	3.2	4
Nutritive-Worthless	2	2897	3.9	0	5.3	5
Nutritive-Worthless	3	2731	4.7	1	5.1	4
Worthless	3	2740	4.4	1	5.4	5
Nutritive-Worthless	3	2742	4.8	1	7.6	6
Worthless	3	2762	4.7	1	2	3
Nutritive-Worthless	3	2765	4.4	1	4.9	6
Nutritive-Worthless	3	2770	4.3	0	6.1	6
Nutritive-Worthless	3	2771	4.4	1	6.5	6
Worthless	3	2775	4.4	1	4.1	3
Nutritive-Worthless	3	2817	4.5	1	10.4	6
Worthless	3	2821	4.5	1	5.7	5
Worthless	3	2825	4.1	1	7	4
Nutritive-Worthless	3	2875	4.1	0	4.3	2
Worthless	3	2878	4	1	5.7	4
Nutritive-Worthless	3	2880	4	0	6	5
Worthless	3	2881	3.8	1	1.6	6
Worthless	3	2882	3.4	1	5.4	4
Nutritive-Worthless	3	2884	4.3	0	1.4	1
Nutritive-Worthless	3	2885	4.2	0	5.1	3
Nutritive-Worthless	3	2886	4	0	1.3	1
Worthless	3	2889	3.8	1	2.5	5
Nutritive-Worthless	3	2891	4.3	0	5.1	4
Nutritive-Worthless	3	2892	4.4	1	1.4	1
Worthless	3	2893	3.8	1	1.1	1
Nutritive-Worthless	3	2894	5	0	2	2
Nutritive-Worthless	3	2895	4.5	0	1.6	2
Worthless	3	2896	3.9	1	5.8	2
Nutritive-Worthless	3	2897	3.9	0	10.3	6
Nutritive-Worthless	3	2900	4	0	1.8	2
Worthless	4	2740	4.4	1	7.5	7
Nutritive-Worthless	4	2765	4.4	1	8.5	7
Nutritive-Worthless	4	2770	4.3	0	3.1	3
Nutritive-Worthless	4	2771	4.4	1	4.4	2
Worthless	4	2772	4.2	1	6.1	5
Worthless	4	2782	4.2	1	4.2	4
Nutritive-Worthless	4	2817	4.5	1	6.5	5
Worthless	4	2821	4.5	1	7.4	5
Worthless	4	2825	4.1	1	7	5
Nutritive-Worthless	4	2875	4.1	0	5.5	3
Worthless	4	2878	4	1	4.2	4
Nutritive-Worthless	4	2880	4	0	2.6	2
Worthless	4	2881	3.8	1	5.4	4
Worthless	4	2882	3.4	1	3.3	3
Worthless	4	2883	3.5	1	4.5	4
Nutritive-Worthless	4	2884	4.3	0	8.4	6
Nutritive-Worthless	4	2885	4.2	0	1.7	2
Nutritive-Worthless	4	2886	4	0	4.9	2
Nutritive-Worthless	4	2887	4	0	1.9	2
Worthless	4	2889	3.8	1	3.6	5
Worthless	4	2893	4.3	1	4.8	3
Nutritive-Worthless	4	2894	5	0	4.4	3
Nutritive-Worthless	4	2897	3.9	0	4.9	4
Worthless	4	2898	3.6	1	3.6	2
Nutritive-Worthless	4	2900	4	0	5.3	4
Nutritive-Worthless	5	2731	4.7	0	5.2	5
Worthless	5	2740	4.4	1	4	5
Nutritive-Worthless	5	2742	4.8	1	5.8	6
Worthless	5	2762	4.7	1	1.4	1
Nutritive-Worthless	5	2770	4.3	0	7.4	7
Nutritive-Worthless	5	2771	4.4	0	0.9	1
Worthless	5	2772	4.2	1	6.7	6
Worthless	5	2782	4.2	1	5.1	4
Nutritive-Worthless	5	2817	4.5	0	2.2	1
Worthless	5	2821	4.5	1	5.4	3
Worthless	5	2825	4.1	1	3.3	3
Nutritive-Worthless	5	2875	4.1	0	4.8	4
Worthless	5	2876	3.6	1	2	2
Worthless	5	2878	4	1	4.8	5
Worthless	5	2879	3.7	1	3.3	4
Nutritive-Worthless	5	2880	4	0	2.3	2
Worthless	5	2881	3.8	1	5.7	5
Worthless	5	2883	3.5	1	6.3	6
Nutritive-Worthless	5	2884	4.3	0	6.3	5
Nutritive-Worthless	5	2885	4.2	0	2.1	3
Nutritive-Worthless	5	2886	4	0	0.1	1
Worthless	5	2889	3.8	1	3	3
Nutritive-Worthless	5	2892	4.4	1	5.7	4
Worthless	5	2893	3.8	1	2.5	3
Nutritive-Worthless	5	2894	5	0	1.5	3
Nutritive-Worthless	5	2895	4.5	0	1	1
Nutritive-Worthless	5	2897	3.9	1	4.2	2
Worthless	5	2898	3.6	1	3.5	3
Nutritive-Worthless	5	2900	4	0	1.2	1
